# Supplementary material
Source: PubMed Central journal article supplement (PMC2730664)

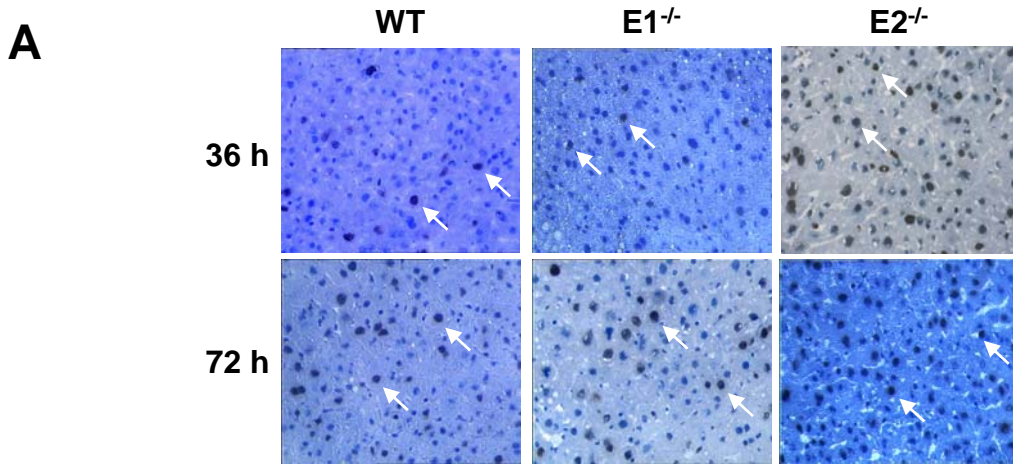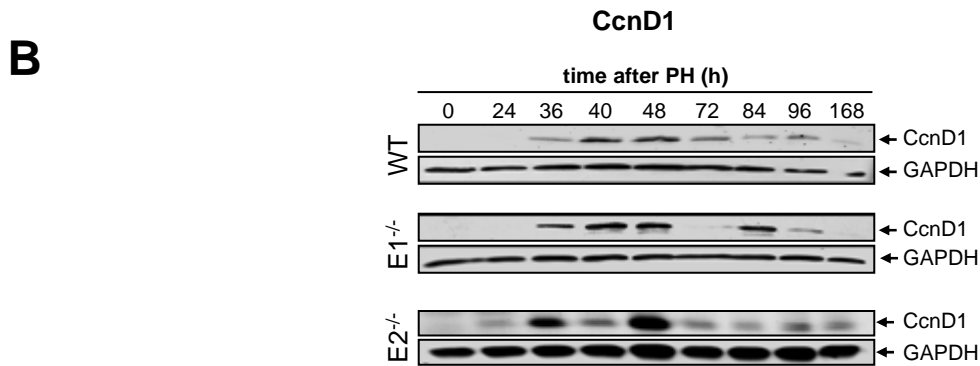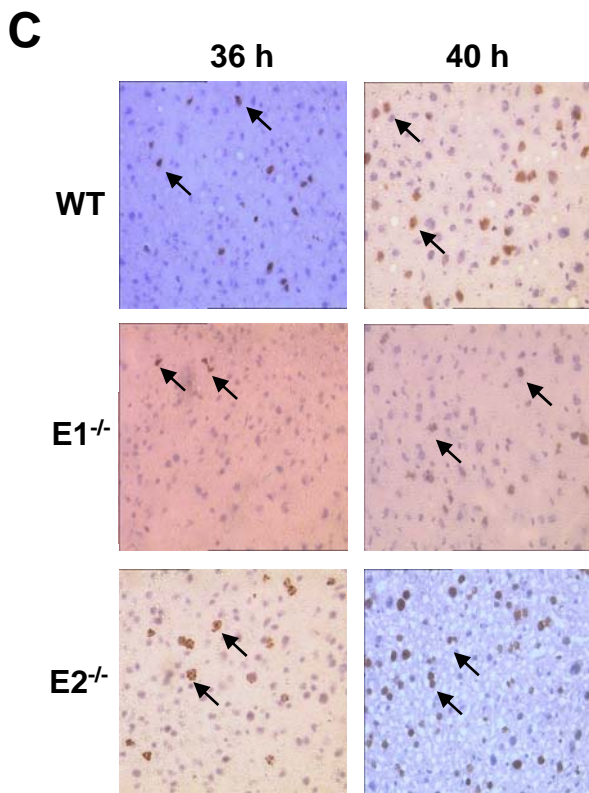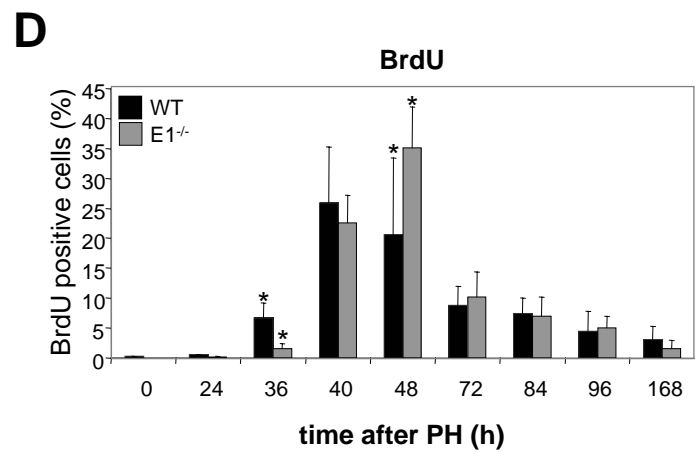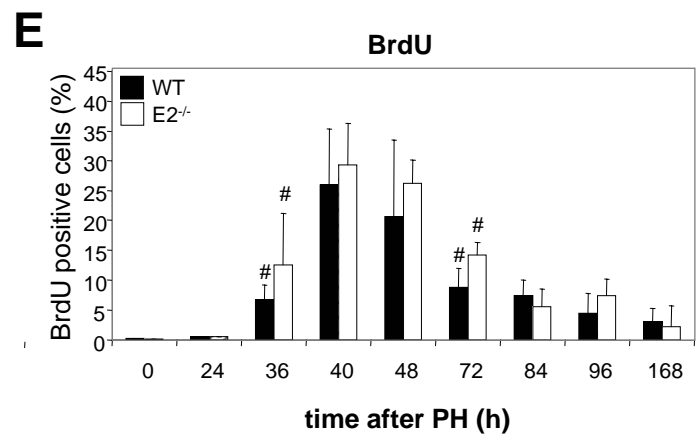

Supplement: NIHMS117448-supplement-02.pdf [file NIHMS117448-supplement-02.pdf]

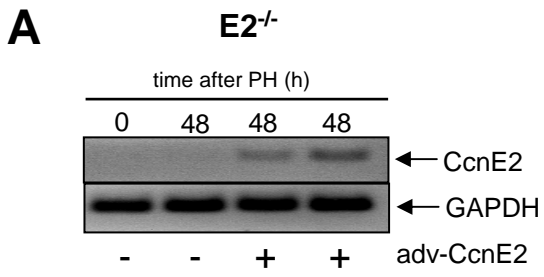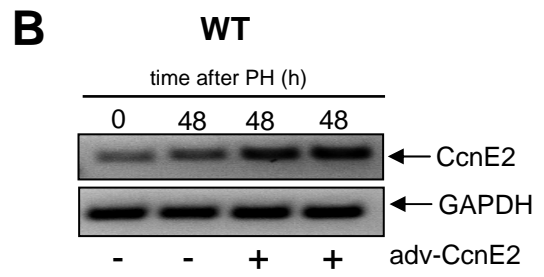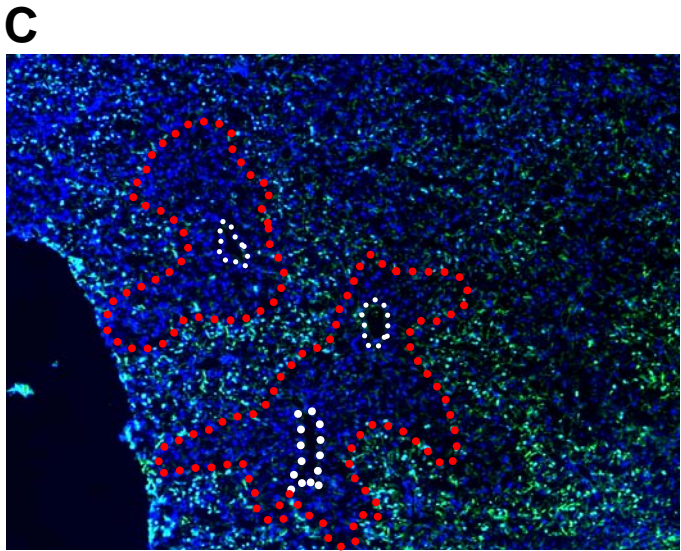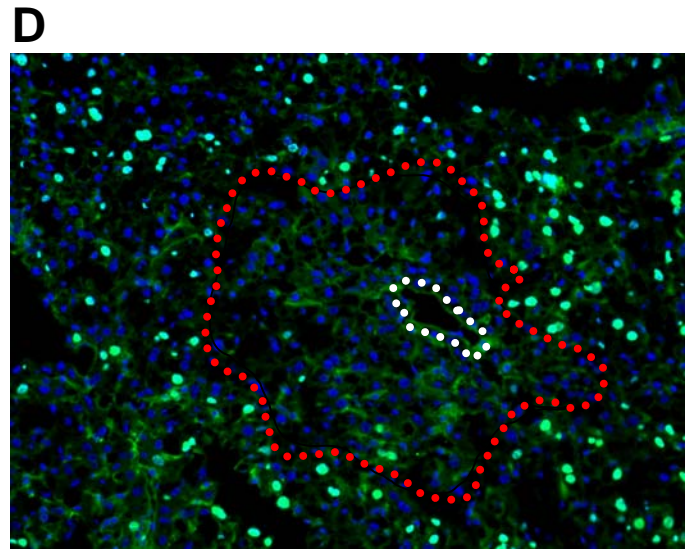

Supplement: NIHMS117448-supplement-03.pdf [file NIHMS117448-supplement-03.pdf]

**A**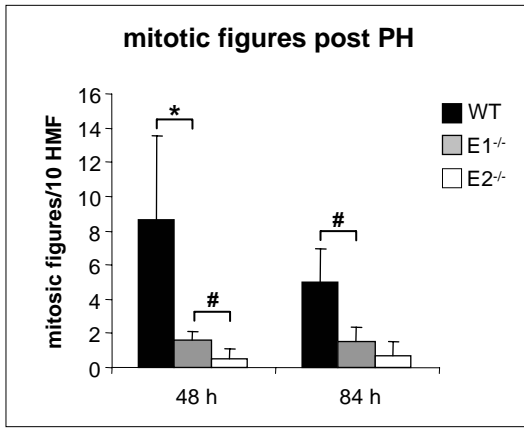**B**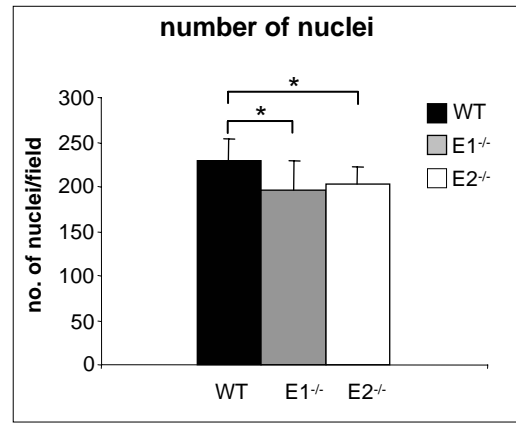**C**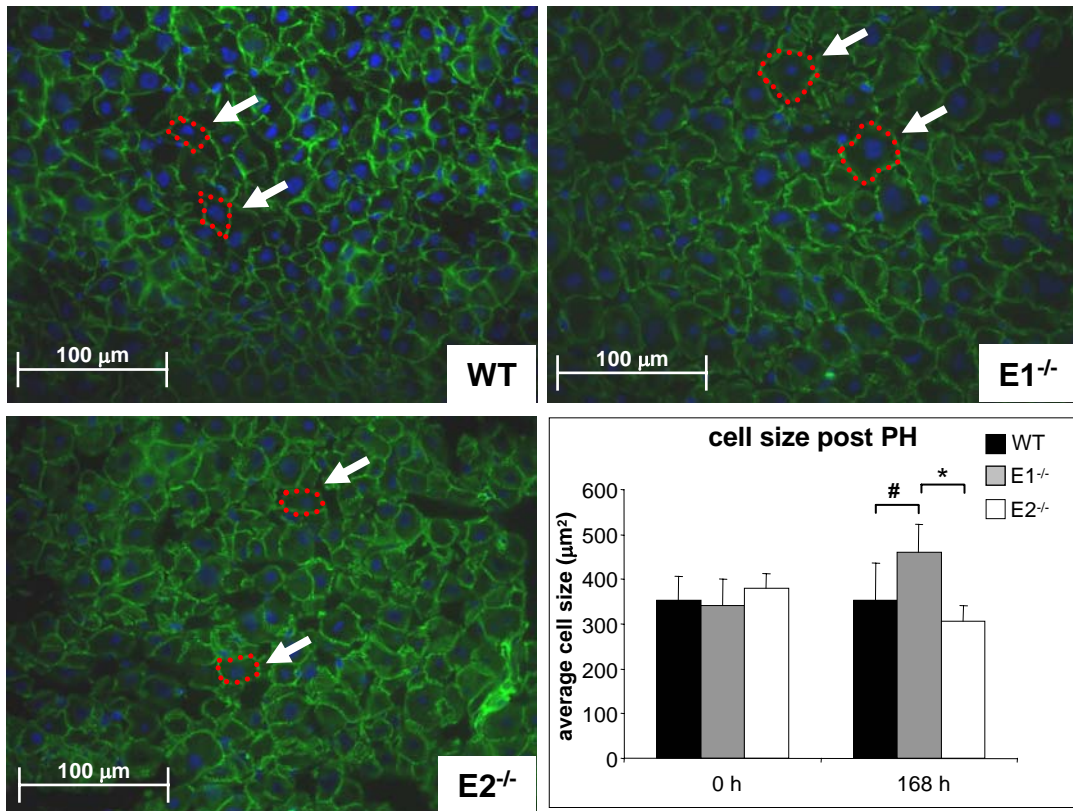

Supplement: NIHMS117448-supplement-04.pdf [file NIHMS117448-supplement-04.pdf]

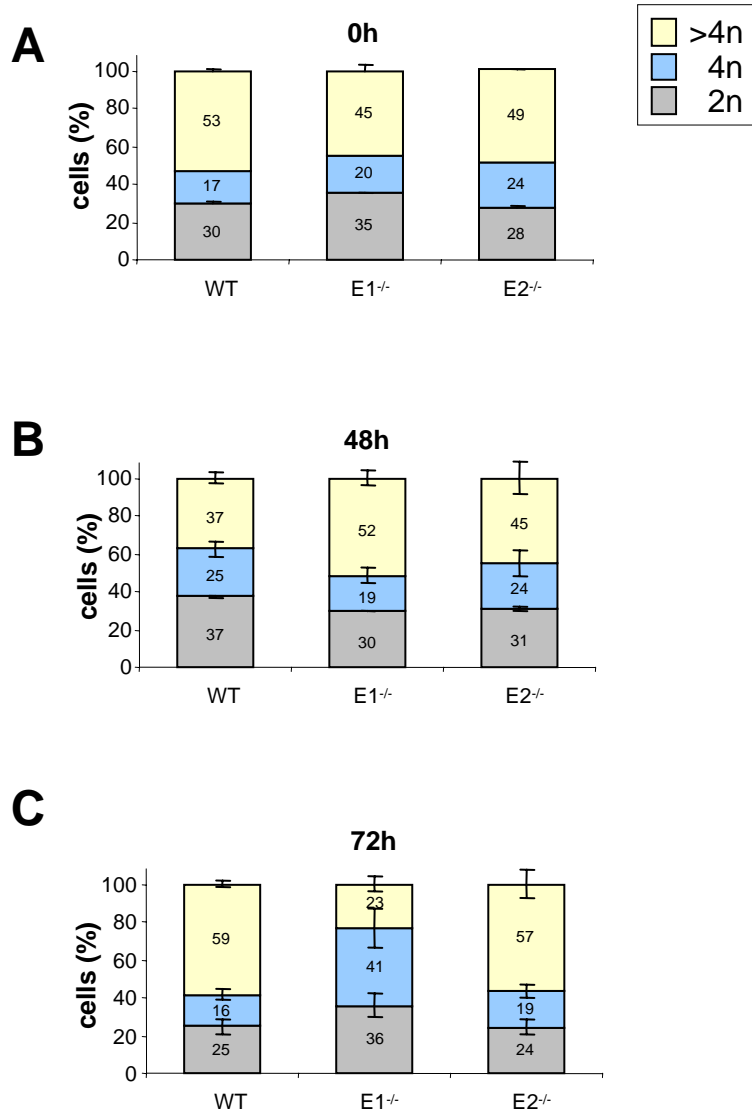

Supplement: NIHMS117448-supplement-05.pdf [file NIHMS117448-supplement-05.pdf]
